# Supplementary material for: Design and synthesis of yolk–shell Fe2O3/N-doped carbon nanospindles with rich oxygen vacancies for robust lithium storage
Source: Royal Society of Chemistry journal article supplement (doi:10.1039/d2cp03309g), 2022-01-01
Supplement: d2cp03309g1.pdf [file d2cp03309g1.pdf]

## Electronic Supplementary Information

# Design and synthesis of yolk-shell Fe<sub>2</sub>O<sub>3</sub>/N-doped carbon nanospindles with rich oxygen vacancies for robust lithium storage

Jianping Lin,<sup>a,1</sup> Lingfang Ruan,<sup>b,1</sup> Jiasheng Wu,<sup>b</sup> Wenyu Yang,<sup>a</sup> Xiaohui Huang,<sup>b</sup>  
Zhiqiang Huang,<sup>b</sup> Shaoming Ying<sup>b</sup> and Zhiya Lin<sup>a,c,\*</sup>

<sup>a</sup> College of Mathematics and Physics, Ningde Normal University, Ningde 352100, China.

<sup>b</sup> College of Chemistry and Materials, Ningde Normal University, Fujian Province  
University Key Laboratory of Green Energy and Environment Catalysis, Ningde 352100,  
China.

<sup>c</sup> College of Physics and Energy, Fujian Normal University, Fujian Provincial Solar Energy  
Conversion and Energy Storage Engineering Technology Research Center, Fuzhou 350117,  
China.

<sup>1</sup> These authors contributed equally to this work.

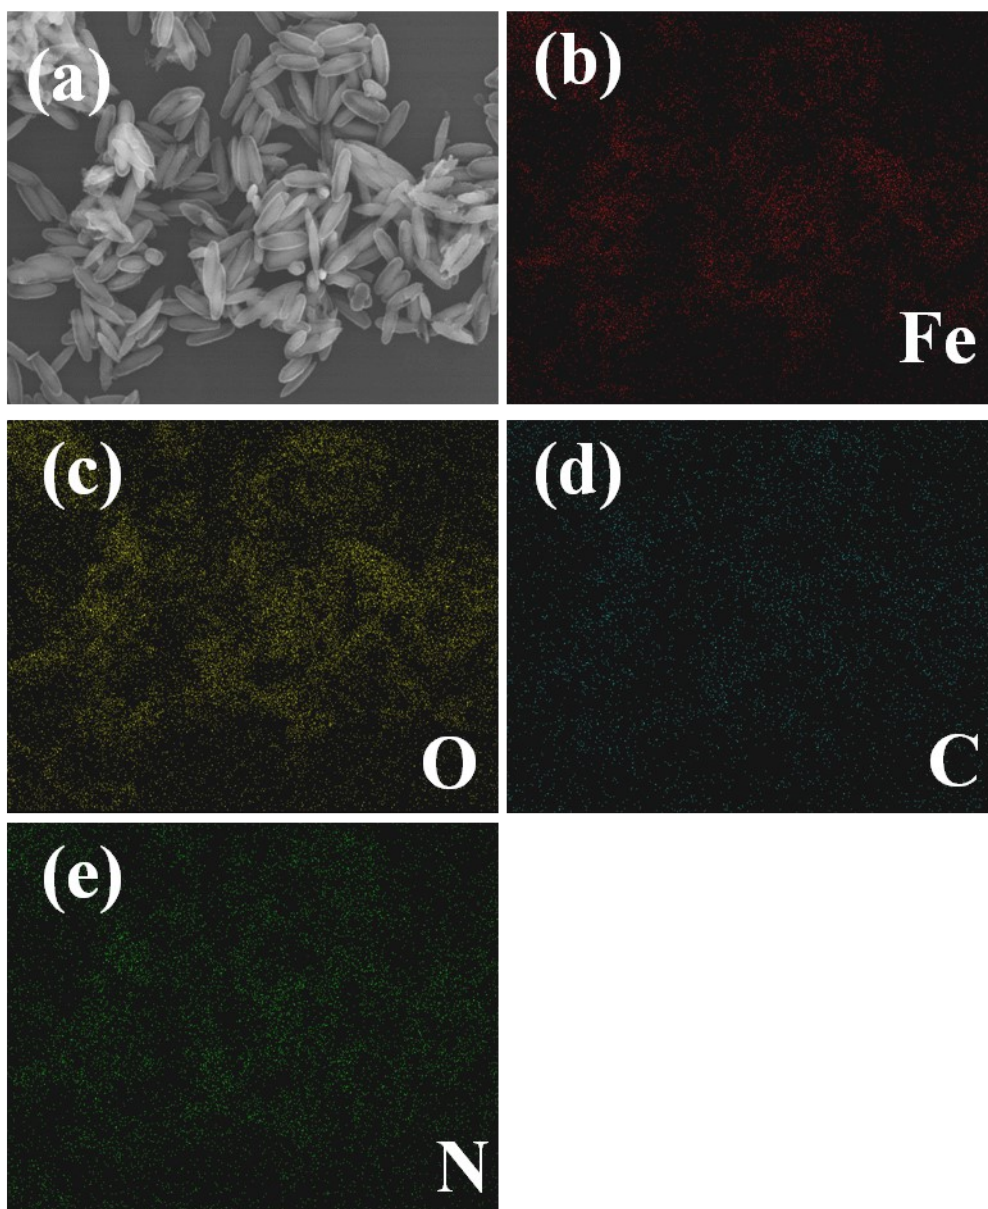

**Fig. S1** (a-e) Element maps of YS-Fe<sub>2</sub>O<sub>3</sub>@NC.

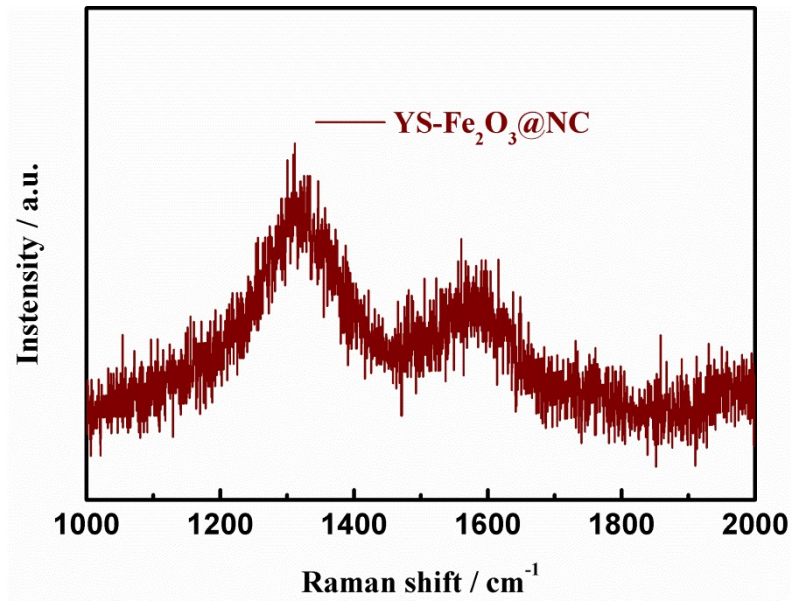

Fig. S2 Raman spectrum of YS-Fe<sub>2</sub>O<sub>3</sub>@NC.
